# Supplementary material
Source: Research Square preprint supplement (doi:10.21203/rs.3.rs-8663548/v1)
Supplement: Supplementary file 1 [file d6b0241c6f5d574688859147.xlsx]

## Sheet: Sheet1
	Input varibles							Output varibles(athletic performance )
ID	Age	Sex	BMI	COVID_Count	Sport Category	Craniovertebral_Angle (CVA)		Agility_TTest_s	Vertical_Jump_cm	Stork_Balance_s	Y_Balance_%
1	22.7	Male	21.9	0	Upper Limb–Dominant Sports	57.54		8	44.37	27.98	89.76
2	22.7	Female	20.9	0	Upper Limb–Dominant Sports	57.03		7.6	44.01	27.29	88.9
3	22	Female	22.2	0	Upper Limb–Dominant Sports	57.01		7.5	44.01	27.26	88.55
4	22.8	Female	23.4	0	Upper Limb–Dominant Sports	56.48		7.6	43.99	27.18	88.42
5	20.2	Female	22.6	1	Upper Limb–Dominant Sports	44.35		11.98	37.13	21.28	82.06
6	19.7	Female	21.8	1	Upper Limb–Dominant Sports	44.27		12.07	37.04	21.26	82
7	21.6	Male	20.3	0	Lower Limb–Dominant Sports	44.24		12.13	37.01	21.21	81.88
8	20.5	Female	22.6	1	Lower Limb–Dominant Sports	43.75		12.17	36.86	21.12	81.66
9	21.9	Male	21.5	1	Lower Limb–Dominant Sports	43.67		12.23	36.85	21.11	81.63
10	24.1	Male	21.9	2	Lower Limb–Dominant Sports	43.37		12.34	36.71	21.1	81.5
11	23.3	Male	19.3	1	Lower Limb–Dominant Sports	43.28		12.4	36.71	21.1	81.48
12	24.6	Female	22.7	1	Lower Limb–Dominant Sports	43.22		12.44	36.5	20.95	81.36
13	24.5	Male	22.9	1	Lower Limb–Dominant Sports	42.82		13	35.73	20.9	81.35
14	22.7	Male	21.9	1	Lower Limb–Dominant Sports	48.19		7.42	40.93	23.04	85.01
15	22.7	Female	20.9	1	Lower Limb–Dominant Sports	46.92		7.44	39.16	23.83	81.36
16	22	Female	22.2	1	Upper Limb–Dominant Sports	48.5		7.69	39.09	22.33	85.62
17	22.8	Female	23.4	1	Upper Limb–Dominant Sports	50.25		7.76	40.95	24.42	83.65
18	25.2	Female	19.3	1	Upper Limb–Dominant Sports	46.73		7.85	38.88	24.16	83.61
19	19.6	Male	21.4	1	Lower Limb–Dominant Sports	46.73		7.86	39.42	24.21	83.76
20	26	Male	22.5	1	Lower Limb–Dominant Sports	53.68		8.4	43.01	25.98	87.29
21	24	Female	22.1	0	Lower Limb–Dominant Sports	53.67		8.41	42.95	25.92	87.29
22	20.3	Female	22.5	1	Lower Limb–Dominant Sports	53.66		8.41	42.93	25.91	87.26
23	19.6	Male	20.8	1	Lower Limb–Dominant Sports	53.6		8.42	42.85	25.88	87.26
24	22.8	Male	23.6	0	Lower Limb–Dominant Sports	53.59		8.45	42.85	25.86	87.17
25	23.5	Female	24.9	0	Upper Limb–Dominant Sports	53.57		8.45	42.85	25.83	87.15
26	23.6	Female	20.9	1	Upper Limb–Dominant Sports	53.54		8.5	42.84	25.78	87.13
27	22.5	Female	24.3	1	Upper Limb–Dominant Sports	53.53		8.55	42.83	25.77	87.12
28	19.7	Male	23.6	0	Lower Limb–Dominant Sports	53.41		8.61	42.81	25.73	87.1
29	22.8	Female	21.5	1	Lower Limb–Dominant Sports	53.35		8.64	42.8	25.73	87.03
30	22.1	Female	20.3	1	Upper Limb–Dominant Sports	53.27		8.68	42.8	25.72	86.97
31	22.6	Female	24.4	1	Upper Limb–Dominant Sports	53.14		8.69	42.77	25.71	86.94
32	21.7	Male	23.7	2	Lower Limb–Dominant Sports	53.06		8.71	42.65	25.65	86.94
33	22.7	Male	22	1	Lower Limb–Dominant Sports	53.05		8.72	42.65	25.64	86.94
34	18.8	Male	22.5	1	Lower Limb–Dominant Sports	53.05		8.73	42.61	25.63	86.92
35	21.7	Female	21.5	1	Upper Limb–Dominant Sports	53.05		8.73	42.55	25.63	86.88
36	22.9	Female	20.8	1	Upper Limb–Dominant Sports	52.93		8.75	42.51	25.61	86.87
37	21	Female	20.7	1	Upper Limb–Dominant Sports	52.91		8.77	42.45	25.59	86.85
38	22.2	Female	21.9	1	Upper Limb–Dominant Sports	52.87		8.78	42.33	25.55	86.79
39	21.3	Female	24.5	1	Upper Limb–Dominant Sports	52.83		8.8	42.23	25.5	86.77
40	24.7	Male	24.4	2	Lower Limb–Dominant Sports	52.79		8.8	42.17	25.45	86.75
41	22.9	Female	22.8	0	Upper Limb–Dominant Sports	52.78		8.8	42.17	25.45	86.71
42	23	Male	23	1	Lower Limb–Dominant Sports	52.7		8.82	42.15	25.45	86.68
43	26	Female	22.8	0	Upper Limb–Dominant Sports	52.69		8.82	42.15	25.44	86.62
44	21.1	Female	22.1	1	Upper Limb–Dominant Sports	52.69		8.83	42.13	25.43	86.59
45	22.5	Female	22.5	1	Upper Limb–Dominant Sports	52.65		8.84	42.06	25.41	86.54
46	17.9	Female	22.2	1	Upper Limb–Dominant Sports	52.62		8.84	42.06	25.39	86.49
47	20.2	Female	21.5	0	Upper Limb–Dominant Sports	52.62		8.86	42.02	25.39	86.46
48	22.9	Female	21.9	1	Upper Limb–Dominant Sports	52.6		8.89	42.02	25.33	86.42
49	22.7	Female	23.6	1	Upper Limb–Dominant Sports	52.56		8.94	42.01	25.32	86.38
50	26	Male	22.5	1	Lower Limb–Dominant Sports	44.38		11	38.19	22.55	83.32
51	24	Female	22.1	0	Lower Limb–Dominant Sports	50.13		8.41	39.19	22.94	85.91
52	23.7	Female	21.8	1	Lower Limb–Dominant Sports	52.53		8.97	41.93	25.23	86.36
53	23.1	Female	23.8	0	Lower Limb–Dominant Sports	52.47		8.97	41.92	25.18	86.35
54	21.8	Female	21.2	1	Lower Limb–Dominant Sports	53.93		7	42.06	25.78	85.54
55	18.7	Male	23.1	1	Lower Limb–Dominant Sports	45.57		10.51	40.79	21.26	83.84
56	26	Female	19.7	1	Lower Limb–Dominant Sports	55.83		7.86	43.55	26.61	88.15
57	23.6	Male	22.7	1	Lower Limb–Dominant Sports	55.2		7.95	43.48	26.51	88.14
58	23.2	Male	22.1	1	Lower Limb–Dominant Sports	55.01		7.96	43.46	26.46	88.05
59	23.6	Male	23.9	1	Lower Limb–Dominant Sports	54.91		6	43.43	26.4	87.96
60	22.9	Female	22.8	1	Lower Limb–Dominant Sports	48.68		8.8	38.29	23.52	86.32
61	23	Male	23	2	Lower Limb–Dominant Sports	47.54		8.82	39.98	22.55	83.51
62	26	Female	22.8	2	Upper Limb–Dominant Sports	46.97		8.82	38.84	23.29	84.35
63	21.1	Female	22.1	1	Upper Limb–Dominant Sports	46.6		8.83	38.57	23.86	82.41
64	22.5	Female	22.5	3	Upper Limb–Dominant Sports	44.24		8.84	36.5	20.9	81.48
65	17.9	Female	22.2	1	Upper Limb–Dominant Sports	45.76		8.84	40.02	22.39	82.29
66	20.2	Female	21.5	0	Upper Limb–Dominant Sports	46.28		8.86	38.88	23.25	82.87
67	22.9	Female	21.9	1	Upper Limb–Dominant Sports	49.31		8.89	41.01	24.05	83.7
68	21.6	Female	19.8	2	Upper Limb–Dominant Sports	51.95		9.16	41.68	24.88	86.09
69	22.9	Female	20.1	1	Upper Limb–Dominant Sports	51.91		9.18	41.65	24.88	86.07
70	22.1	Female	20.3	0	Upper Limb–Dominant Sports	51.86		9.18	41.64	24.88	86.07
71	22.9	Female	23.6	0	Upper Limb–Dominant Sports	51.83		9.19	41.62	24.87	86.06
72	19.7	Female	23.7	0	Upper Limb–Dominant Sports	51.78		9.19	41.61	24.86	86.06
73	17.5	Female	24.1	2	Lower Limb–Dominant Sports	44.81		9.13	37.77	22.92	83.21
74	21.7	Male	24.6	2	Lower Limb–Dominant Sports	48.83		9.15	39.34	25.17	85.59
75	24.9	Female	18.5	1	Lower Limb–Dominant Sports	51.63		9.26	41.57	24.8	86.05
76	22.1	Male	22.7	1	Lower Limb–Dominant Sports	51.61		9.26	41.56	24.8	86.03
77	23.1	Male	21.3	1	Lower Limb–Dominant Sports	51.57		9.28	41.55	24.8	86.03
78	25.1	Female	20.3	1	Lower Limb–Dominant Sports	51.57		9.28	41.53	24.78	86.03
79	22.9	Male	21.4	1	Lower Limb–Dominant Sports	51.5		9.31	41.53	24.76	86.01
80	23.1	Male	19.1	1	Lower Limb–Dominant Sports	51.48		9.31	41.49	24.74	86
81	20.8	Male	20.2	1	Lower Limb–Dominant Sports	51.47		9.31	41.47	24.74	85.99
82	19.6	Female	24.6	1	Lower Limb–Dominant Sports	51.46		9.32	41.47	24.72	85.99
83	21.7	Male	24.6	1	Lower Limb–Dominant Sports	52.03		9.15	41.7	24.91	86.15
84	23.3	Female	24.9	0	Lower Limb–Dominant Sports	53.75		8.34	43.07	26.09	87.44
85	21.1	Female	22.4	1	Lower Limb–Dominant Sports	53.74		8.37	43.06	26.07	87.39
86	24.1	Male	23.5	1	Lower Limb–Dominant Sports	53.73		8.38	43.02	26	87.31
87	26	Male	22.5	1	Lower Limb–Dominant Sports	53.68		6	43.01	25.98	87.29
88	24	Female	22.1	1	Lower Limb–Dominant Sports	53.67		8.41	42.95	25.92	87.29
89	20.3	Female	22.5	1	Lower Limb–Dominant Sports	53.66		8.41	42.93	25.91	87.26
90	19.6	Male	20.8	1	Lower Limb–Dominant Sports	53.6		7	42.85	25.88	87.26
91	22.8	Male	23.6	0	Lower Limb–Dominant Sports	53.59		8.45	42.85	25.86	87.17
92	23.5	Female	24.9	1	Lower Limb–Dominant Sports	53.57		7	42.85	25.83	87.15
93	23.6	Female	20.9	1	Lower Limb–Dominant Sports	53.54		8.5	42.84	25.78	87.13
94	22.5	Female	24.3	1	Lower Limb–Dominant Sports	53.53		7	42.83	25.77	87.12
95	23.3	Male	24.5	1	Lower Limb–Dominant Sports	50.97		9.47	41.24	24.55	85.79
96	20	Male	21.3	1	Lower Limb–Dominant Sports	49.26		10.08	40.17	23.76	84.83
97	19.6	Male	23.5	1	Lower Limb–Dominant Sports	49.21		10.1	40.16	23.75	84.81
98	22	Female	22.7	1	Lower Limb–Dominant Sports	49.18		10.11	40.16	23.74	84.8
99	22.7	Female	24.3	1	Lower Limb–Dominant Sports	49.15		10.12	40.14	23.74	84.79
100	23.2	Female	23.5	1	Lower Limb–Dominant Sports	49.14		10.15	40.13	23.73	84.79
101	25.3	Male	21.9	1	Lower Limb–Dominant Sports	49.07		10.15	40.1	23.69	84.75
102	23.1	Male	22.8	1	Lower Limb–Dominant Sports	49.07		10.16	40.05	23.68	84.75
103	23.7	Male	24.6	0	Lower Limb–Dominant Sports	50.74		9.51	41.1	24.47	85.71
104	21.4	Male	23.4	1	Lower Limb–Dominant Sports	50.67		9.52	41.08	24.46	85.69
105	17.1	Male	23.3	1	Lower Limb–Dominant Sports	50.67		9.53	41.03	24.45	85.67
106	23.4	Male	23.9	1	Lower Limb–Dominant Sports	50.66		9.54	41.03	24.45	85.65
107	23.3	Male	19.5	1	Lower Limb–Dominant Sports	50.66		9.54	41.01	24.42	85.65
108	22.4	Female	18.9	2	Lower Limb–Dominant Sports	50.62		9.56	40.99	24.42	85.65
109	22.2	Male	21.7	1	Lower Limb–Dominant Sports	50.6		9.57	40.98	24.42	85.65
110	21	Male	23.7	1	Lower Limb–Dominant Sports	50.59		9.57	40.97	24.41	85.65
111	21.4	Male	22	1	Lower Limb–Dominant Sports	50.57		9.58	40.95	24.41	85.64
112	20.9	Female	22.8	1	Lower Limb–Dominant Sports	49.76		9.99	40.5	23.99	85.03
113	24.8	Female	23.5	1	Lower Limb–Dominant Sports	49.73		9.99	40.46	23.97	85.03
114	23.5	Female	22.3	2	Lower Limb–Dominant Sports	49.72		9.99	40.44	23.95	85.02
115	23	Male	22.5	1	Lower Limb–Dominant Sports	49.7		9.99	40.43	23.93	85.01
116	22.7	Male	21.5	1	Lower Limb–Dominant Sports	49.67		9.99	40.42	23.93	84.99
117	23.4	Male	24.9	1	Lower Limb–Dominant Sports	50.47		9.63	40.9	24.32	85.54
118	24.8	Male	23.3	1	Lower Limb–Dominant Sports	50.46		9.64	40.89	24.32	85.54
119	21.4	Male	20	1	Lower Limb–Dominant Sports	50.44		9.64	40.85	24.31	85.54
120	23.2	Female	23.5	1	Lower Limb–Dominant Sports	50.42		9.65	40.85	24.29	85.53
121	25.2	Male	20.8	1	Lower Limb–Dominant Sports	50.41		9.66	40.84	24.29	85.53
122	23.6	Female	21.7	2	Lower Limb–Dominant Sports	47.68		8.24	38.46	22.18	82.98
123	20.9	Male	23.3	2	Lower Limb–Dominant Sports	43.37		8.29	37.74	21.21	81.07
124	24.3	Male	21.9	1	Lower Limb–Dominant Sports	50.36		9.68	40.81	24.23	85.52
125	19.6	Male	24.7	1	Lower Limb–Dominant Sports	50.33		9.72	40.81	24.23	85.5
126	21	Female	20.3	1	Lower Limb–Dominant Sports	50.33		9.73	40.79	24.22	85.5
127	25.3	Female	21.1	1	Lower Limb–Dominant Sports	50.33		9.73	40.79	24.21	85.49
128	23.1	Male	22	1	Lower Limb–Dominant Sports	50.33		9.75	40.77	24.21	85.49
129	20.1	Female	23.8	1	Lower Limb–Dominant Sports	50.33		9.76	40.76	24.2	85.46
130	17.4	Male	22.2	1	Lower Limb–Dominant Sports	50.32		9.8	40.73	24.16	85.45
131	19.5	Male	18.7	1	Lower Limb–Dominant Sports	50.31		9.81	40.72	24.15	85.38
132	22.6	Female	24.9	1	Lower Limb–Dominant Sports	50.28		9.82	40.72	24.15	85.37
133	23.9	Female	23.2	1	Lower Limb–Dominant Sports	50.28		9.83	40.71	24.15	85.37
134	17	Female	22.3	2	Lower Limb–Dominant Sports	50.26		9.84	40.7	24.13	85.36
135	23.4	Female	22.1	1	Lower Limb–Dominant Sports	50.25		9.85	40.68	24.13	85.29
136	23.4	Female	20.5	2	Lower Limb–Dominant Sports	50.22		9.86	40.67	24.12	85.23
137	21.2	Male	21.4	1	Lower Limb–Dominant Sports	50.19		9.86	40.66	24.1	85.22
138	22.4	Male	21.5	1	Lower Limb–Dominant Sports	50.16		9.87	40.65	24.09	85.2
139	20.1	Female	22.5	1	Lower Limb–Dominant Sports	50.15		9.88	40.65	24.09	85.2
140	19.1	Male	21.7	1	Lower Limb–Dominant Sports	50.13		9.88	40.64	24.09	85.17
141	26	Male	21.3	1	Lower Limb–Dominant Sports	50.12		9.88	40.63	24.08	85.17
142	24.3	Female	21.6	1	Lower Limb–Dominant Sports	50.11		9.9	40.61	24.07	85.16
143	22.5	Male	20.9	0	Lower Limb–Dominant Sports	50.02		9.92	40.6	24.05	85.16
144	25.1	Male	23	1	Lower Limb–Dominant Sports	50.01		9.94	40.59	24.04	85.16
145	26	Female	24.4	2	Lower Limb–Dominant Sports	49.98		9.96	40.58	24.03	85.16
146	19.6	Female	22.1	1	Lower Limb–Dominant Sports	49.96		9.97	40.58	24.03	85.15
147	23.5	Male	21.6	1	Lower Limb–Dominant Sports	49.95		9.97	40.56	24.02	85.14
148	21.5	Male	21	1	Lower Limb–Dominant Sports	49.91		9.97	40.52	24.02	85.1
149	22.9	Female	21.1	1	Lower Limb–Dominant Sports	49.91		9.98	40.52	24.01	85.09
150	23	Male	24.6	1	Lower Limb–Dominant Sports	49.86		9.98	40.51	24.01	85.08
151	22.3	Male	23.2	1	Lower Limb–Dominant Sports	49.81		9.99	40.51	24	85.04
152	24.1	Female	22.4	1	Lower Limb–Dominant Sports	50.56		9.58	40.95	24.4	85.62
153	21.7	Female	24.1	1	Lower Limb–Dominant Sports	50.53		9.6	40.93	24.4	85.62
154	22.6	Female	21.6	1	Lower Limb–Dominant Sports	50.52		9.61	40.93	24.38	85.62
155	24.1	Male	24.7	1	Lower Limb–Dominant Sports	50.5		9.61	40.92	24.37	85.61
156	22.4	Male	21.1	1	Lower Limb–Dominant Sports	50.48		9.61	40.92	24.35	85.59
157	26	Male	19.5	1	Lower Limb–Dominant Sports	49.64		10	40.42	23.92	84.99
158	23	Male	20.9	2	Lower Limb–Dominant Sports	49.63		10	40.41	23.92	84.97
159	24.2	Male	19.2	1	Lower Limb–Dominant Sports	49.61		10.01	40.4	23.9	84.96
160	21.7	Female	23.4	2	Lower Limb–Dominant Sports	49.56		10.01	40.39	23.9	84.95
161	18.3	Female	21.9	1	Lower Limb–Dominant Sports	49.53		10.01	40.36	23.89	84.95
162	21.2	Female	21.3	2	Lower Limb–Dominant Sports	49.53		10.02	40.34	23.88	84.95
163	19.9	Male	22.2	0	Lower Limb–Dominant Sports	49.46		10.02	40.3	23.86	84.95
164	23.6	Female	20.1	1	Lower Limb–Dominant Sports	49.46		10.02	40.3	23.85	84.94
165	24.6	Female	21.6	2	Lower Limb–Dominant Sports	49.44		10.02	40.3	23.83	84.94
166	23.6	Female	21.1	3	Lower Limb–Dominant Sports	49.43		10.02	40.27	23.83	84.94
167	22.2	Male	22.6	0	Lower Limb–Dominant Sports	49.39		10.04	40.26	23.83	84.92
168	19.7	Female	24.4	3	Lower Limb–Dominant Sports	49.34		10.05	40.24	23.81	84.92
169	23.7	Female	23.1	2	Lower Limb–Dominant Sports	49.32		10.06	40.23	23.8	84.91
170	24.4	Male	23.6	1	Lower Limb–Dominant Sports	49.31		10.06	40.2	23.8	84.91
171	25.2	Male	22.2	1	Lower Limb–Dominant Sports	49.3		10.06	40.19	23.78	84.89
172	22.3	Male	21.3	2	Lower Limb–Dominant Sports	49.27		10.07	40.18	23.77	84.87
173	23.3	Female	20.6	1	Lower Limb–Dominant Sports	49.26		10.08	40.18	23.76	84.85
174	25.2	Male	21.6	1	Lower Limb–Dominant Sports	50.95		9.48	41.23	24.55	85.79
175	26	Male	19.8	1	Lower Limb–Dominant Sports	50.93		9.48	41.2	24.55	85.78
176	26	Male	21	1	Lower Limb–Dominant Sports	50.93		9.48	41.15	24.51	85.76
177	26	Male	24.4	0	Lower Limb–Dominant Sports	50.9		9.48	41.14	24.5	85.74
178	24.9	Female	20.5	1	Lower Limb–Dominant Sports	50.85		9.48	41.14	24.49	85.72
179	20.3	Male	24.5	1	Lower Limb–Dominant Sports	50.82		9.51	41.13	24.48	85.72
180	22.2	Female	23.4	1	Lower Limb–Dominant Sports	50.79		9.51	41.11	24.48	85.71
181	21.7	Male	22.4	1	Lower Limb–Dominant Sports	49.06		10.16	40.04	23.68	84.75
182	18.9	Female	21.3	1	Upper Limb–Dominant Sports	49.04		10.16	40.02	23.64	84.74
183	20.5	Female	18.9	0	Upper Limb–Dominant Sports	49.03		10.17	40	23.62	84.74
184	25.2	Male	20.4	2	Upper Limb–Dominant Sports	49		10.19	39.98	23.58	84.72
185	23.8	Female	24.8	1	Upper Limb–Dominant Sports	49		10.2	39.98	23.56	84.72
186	26	Male	24.3	2	Upper Limb–Dominant Sports	48.9		10.21	39.93	23.56	84.71
187	24.8	Female	22.3	1	Upper Limb–Dominant Sports	48.89		10.22	39.91	23.56	84.7
188	23.8	Male	22.4	3	Upper Limb–Dominant Sports	48.88		10.23	39.91	23.53	84.67
189	21.1	Female	21.6	1	Upper Limb–Dominant Sports	48.86		10.24	39.89	23.52	84.66
190	23.4	Male	21	1	Upper Limb–Dominant Sports	48.85		10.25	39.89	23.5	84.63
191	22.4	Female	21.9	1	Upper Limb–Dominant Sports	48.84		10.26	39.87	23.48	84.63
192	19.3	Female	20.1	2	Upper Limb–Dominant Sports	48.83		10.28	39.85	23.47	84.62
193	20.6	Female	24.9	1	Upper Limb–Dominant Sports	48.83		10.3	39.85	23.43	84.62
194	26	Female	22.8	1	Upper Limb–Dominant Sports	48.79		10.3	39.84	23.43	84.61
195	25.4	Male	22.9	2	Upper Limb–Dominant Sports	48.73		10.31	39.83	23.41	84.6
196	25.1	Male	21.8	0	Upper Limb–Dominant Sports	48.68		10.31	39.81	23.4	84.59
197	21.3	Male	20.9	1	Upper Limb–Dominant Sports	48.68		10.32	39.78	23.39	84.57
198	22.7	Female	21.5	1	Upper Limb–Dominant Sports	48.67		10.33	39.77	23.39	84.57
199	24	Female	22.6	1	Upper Limb–Dominant Sports	48.63		10.34	39.75	23.37	84.55
200	26	Female	23.7	1	Upper Limb–Dominant Sports	48.53		10.34	39.69	23.36	84.55
201	23.2	Female	20.1	3	Upper Limb–Dominant Sports	48.5		10.34	39.69	23.36	84.55
202	21.5	Male	23.9	1	Lower Limb–Dominant Sports	48.42		10.35	39.68	23.36	84.53
203	22.4	Female	21.4	1	Upper Limb–Dominant Sports	48.42		10.36	39.65	23.34	84.52
204	21.1	Female	23.4	1	Upper Limb–Dominant Sports	48.36		10.38	39.64	23.33	84.52
205	22.1	Male	22.1	1	Lower Limb–Dominant Sports	48.35		10.39	39.63	23.32	84.46
206	23.6	Female	22.5	1	Lower Limb–Dominant Sports	48.33		10.39	39.62	23.31	84.46
207	24.4	Male	21.7	1	Lower Limb–Dominant Sports	48.33		10.4	39.6	23.3	84.42
208	21.2	Male	21.4	2	Lower Limb–Dominant Sports	48.31		10.43	39.6	23.3	84.42
209	20.7	Female	24.5	1	Upper Limb–Dominant Sports	48.29		10.43	39.59	23.29	84.38
210	24.5	Male	23.5	2	Upper Limb–Dominant Sports	48.26		10.44	39.56	23.25	84.37
211	19.5	Male	21.4	1	Lower Limb–Dominant Sports	48.23		10.44	39.53	23.23	84.36
212	24.8	Female	23	1	Upper Limb–Dominant Sports	48.19		10.45	39.52	23.23	84.35
213	20.5	Female	20.6	1	Upper Limb–Dominant Sports	48.18		10.46	39.51	23.23	84.34
214	23.1	Female	22.1	1	Lower Limb–Dominant Sports	48.12		10.46	39.5	23.23	84.33
215	23	Male	23.4	1	Lower Limb–Dominant Sports	48.12		10.47	39.48	23.23	84.32
216	20.5	Male	24.9	1	Lower Limb–Dominant Sports	48.1		10.47	39.47	23.22	84.32
217	22.4	Male	20.4	1	Lower Limb–Dominant Sports	48.05		10.47	39.46	23.21	84.26
218	23.2	Male	22.1	0	Lower Limb–Dominant Sports	55.01		7.96	43.46	26.46	88.05
219	23.6	Male	23.9	1	Lower Limb–Dominant Sports	54.91		8.05	43.43	26.4	87.96
220	21.5	Female	20.7	1	Upper Limb–Dominant Sports	54.71		8.13	43.26	26.37	87.91
221	23.5	Female	23.4	1	Upper Limb–Dominant Sports	54.42		8.18	43.25	26.35	87.8
222	23.6	Female	21.7	1	Lower Limb–Dominant Sports	54.39		8.24	43.24	26.33	87.76
223	20.9	Male	23.3	2	Lower Limb–Dominant Sports	54.03		8.29	43.19	26.18	87.57
224	22	Male	21.3	0	Lower Limb–Dominant Sports	53.93		8.33	43.09	26.16	87.54
225	22	Female	23.2	2	Upper Limb–Dominant Sports	53.81		8.33	43.07	26.1	87.51
226	23.3	Female	24.9	2	Upper Limb–Dominant Sports	53.75		8.34	43.07	26.09	87.44
227	21.1	Female	22.4	2	Lower Limb–Dominant Sports	53.74		8.37	43.06	26.07	87.39
228	24	Female	23.2	2	Lower Limb–Dominant Sports	47.87		10.58	39.29	23.05	84.18
229	23.8	Female	21.2	1	Upper Limb–Dominant Sports	47.86		10.59	39.29	23.04	84.17
230	21.8	Female	24.1	1	Upper Limb–Dominant Sports	47.86		10.59	39.25	23.04	84.13
231	21.3	Female	21.1	1	Lower Limb–Dominant Sports	47.85		10.59	39.24	23.02	84.12
232	18.7	Male	22.3	1	Lower Limb–Dominant Sports	47.84		10.6	39.22	22.99	84.1
233	20.8	Female	21.2	1	Lower Limb–Dominant Sports	47.83		10.6	39.2	22.99	84.08
234	24.5	Male	23.9	1	Lower Limb–Dominant Sports	47.79		10.62	39.19	22.99	84.06
235	22.2	Female	21.9	1	Upper Limb–Dominant Sports	47.75		10.63	39.16	22.94	84.06
236	22.7	Female	21.8	1	Upper Limb–Dominant Sports	47.72		10.64	39.12	22.93	84.05
237	26	Female	21.4	1	Lower Limb–Dominant Sports	47.71		10.65	39.09	22.93	84.03
238	21.6	Female	21.1	1	Lower Limb–Dominant Sports	47.68		10.65	39.09	22.93	84.01
239	21.1	Male	19.8	1	Lower Limb–Dominant Sports	47.64		10.65	39.08	22.92	84
240	25.8	Male	23.3	0	Lower Limb–Dominant Sports	47.62		10.69	39.06	22.92	83.97
241	22.6	Female	22.4	1	Lower Limb–Dominant Sports	47.59		10.69	39.04	22.91	83.96
242	19.7	Female	20.2	1	Lower Limb–Dominant Sports	47.54		10.71	39.02	22.9	83.94
243	23.6	Male	20.6	1	Lower Limb–Dominant Sports	47.45		10.73	39	22.88	83.94
244	23.7	Female	23.2	1	Lower Limb–Dominant Sports	47.42		10.73	39	22.86	83.89
245	21.6	Male	22.6	1	Lower Limb–Dominant Sports	47.42		10.74	39	22.85	83.88
246	22.9	Male	22.2	1	Lower Limb–Dominant Sports	47.39		10.76	38.97	22.84	83.88
247	22.2	Female	22.9	1	Lower Limb–Dominant Sports	47.38		10.77	38.94	22.82	83.87
248	25.1	Male	23	3	Lower Limb–Dominant Sports	47.37		10.77	38.93	22.81	83.86
249	24.2	Male	21.5	1	Lower Limb–Dominant Sports	47.34		10.78	38.93	22.81	83.84
250	23.2	Female	21.2	1	Upper Limb–Dominant Sports	47.34		10.8	38.91	22.81	83.84
251	23.1	Female	21.5	1	Upper Limb–Dominant Sports	47.25		10.8	38.9	22.79	83.8
252	25	Female	21.4	1	Lower Limb–Dominant Sports	47.21		10.8	38.88	22.79	83.8
253	22.7	Female	21.7	1	Lower Limb–Dominant Sports	47.17		10.81	38.88	22.76	83.79
254	23.5	Female	21.6	1	Lower Limb–Dominant Sports	47.14		10.82	38.84	22.76	83.78
255	25.2	Female	22	2	Lower Limb–Dominant Sports	47.13		10.84	38.84	22.74	83.76
256	25	Male	22.9	2	Lower Limb–Dominant Sports	47.06		10.86	38.81	22.73	83.73
257	19.8	Male	20.9	1	Lower Limb–Dominant Sports	46.97		10.87	38.8	22.72	83.71
258	19.5	Male	23	1	Lower Limb–Dominant Sports	46.92		10.87	38.78	22.7	83.7
259	21.9	Female	21.5	1	Lower Limb–Dominant Sports	46.9		10.9	38.75	22.69	83.7
260	21.5	Female	20.5	0	Lower Limb–Dominant Sports	46.83		10.92	38.74	22.69	83.7
261	23	Male	22.3	1	Lower Limb–Dominant Sports	46.82		10.92	38.72	22.68	83.69
262	22.7	Male	22.3	1	Upper Limb–Dominant Sports	46.8		10.97	38.71	22.66	83.68
263	26	Female	23.8	1	Upper Limb–Dominant Sports	46.78		10.98	38.7	22.63	83.66
264	22.5	Female	23.5	1	Lower Limb–Dominant Sports	46.76		10.99	38.66	22.63	83.66
265	25.9	Male	21.9	1	Lower Limb–Dominant Sports	46.75		11	38.66	22.63	83.65
266	22.3	Male	22.4	1	Lower Limb–Dominant Sports	46.73		11	38.66	22.6	83.62
267	21.4	Male	21.3	1	Lower Limb–Dominant Sports	46.73		11.06	38.66	22.59	83.61
268	23.4	Male	23	1	Lower Limb–Dominant Sports	46.73		11.08	38.64	22.55	83.61
269	24	Male	22.2	1	Upper Limb–Dominant Sports	46.62		11.11	38.57	22.55	83.6
270	21.5	Female	20.6	1	Upper Limb–Dominant Sports	46.6		11.12	38.57	22.55	83.54
271	25	Male	20.9	1	Lower Limb–Dominant Sports	46.6		11.12	38.55	22.53	83.54
272	23.5	Male	21	1	Lower Limb–Dominant Sports	46.58		11.14	38.54	22.52	83.51
273	21.2	Male	19	1	Lower Limb–Dominant Sports	46.54		11.16	38.54	22.52	83.51
274	20.7	Female	24.9	1	Upper Limb–Dominant Sports	46.54		11.17	38.54	22.51	83.47
275	19.8	Female	20	1	Upper Limb–Dominant Sports	46.44		11.2	38.53	22.45	83.43
276	21.2	Female	20.7	1	Lower Limb–Dominant Sports	46.43		11.2	38.53	22.44	83.41
277	24.1	Female	23.3	1	Lower Limb–Dominant Sports	46.43		11.23	38.48	22.41	83.4
278	21.1	Male	22.6	0	Lower Limb–Dominant Sports	46.42		11.26	38.46	22.41	83.37
279	20.3	Male	22.6	3	Lower Limb–Dominant Sports	46.28		11.27	38.42	22.39	83.37
280	23	Male	21.3	1	Lower Limb–Dominant Sports	46.27		11.29	38.4	22.34	83.32
281	23.3	Male	24.7	1	Lower Limb–Dominant Sports	46.27		11.3	38.36	22.33	83.27
282	22.4	Male	19.8	1	Lower Limb–Dominant Sports	46.26		11.32	38.36	22.29	83.25
283	20.1	Female	20.3	1	Lower Limb–Dominant Sports	46.26		11.33	38.33	22.26	83.24
284	20.9	Female	19.3	1	Lower Limb–Dominant Sports	46.24		11.35	38.3	22.25	83.22
285	26	Female	19.7	1	Lower Limb–Dominant Sports	46.2		11.38	38.3	22.25	83.22
286	21.4	Male	21.4	1	Lower Limb–Dominant Sports	46.16		11.38	38.29	22.24	83.21
287	19.9	Male	22	3	Lower Limb–Dominant Sports	46.14		11.38	38.28	22.22	83.21
288	22.7	Male	19.7	1	Lower Limb–Dominant Sports	46.11		11.43	38.27	22.21	83.09
289	20	Male	21.7	1	Lower Limb–Dominant Sports	46.08		11.43	38.24	22.19	83.05
290	22.3	Female	24	1	Upper Limb–Dominant Sports	46.07		11.46	38.24	22.18	82.99
291	23.2	Female	23.8	1	Upper Limb–Dominant Sports	46		11.51	38.21	22.17	82.98
292	19.6	Female	21.6	1	Lower Limb–Dominant Sports	46		11.53	38.19	22.17	82.98
293	20.7	Female	24.2	1	Lower Limb–Dominant Sports	45.91		11.56	38.06	22.16	82.95
294	21.2	Male	21.7	0	Lower Limb–Dominant Sports	45.85		11.6	38.06	22.16	82.94
295	24.4	Female	22.5	1	Upper Limb–Dominant Sports	45.8		11.62	38	22.13	82.89
296	22.2	Female	22	1	Upper Limb–Dominant Sports	45.76		11.63	37.99	22.12	82.87
297	21.5	Male	23.6	1	Lower Limb–Dominant Sports	45.58		11.67	37.92	22.12	82.82
298	21.4	Male	22	1	Lower Limb–Dominant Sports	45.57		11.67	37.84	22.09	82.75
299	21.2	Male	20.8	2	Lower Limb–Dominant Sports	45.52		11.69	37.84	22.09	82.74
300	21.1	Female	21.4	2	Upper Limb–Dominant Sports	45.4		11.69	37.77	22.07	82.74
301	21.7	Male	21.8	1	Upper Limb–Dominant Sports	45.38		11.71	37.75	22.07	82.73
302	24	Male	23.3	1	Lower Limb–Dominant Sports	45.25		11.77	37.74	22.05	82.7
303	22.2	Female	19.6	1	Lower Limb–Dominant Sports	45.17		11.78	37.7	22.03	82.41
304	21.9	Male	24.9	1	Lower Limb–Dominant Sports	45.08		11.8	37.65	22.02	82.37
305	24.3	Female	21.5	1	Lower Limb–Dominant Sports	44.99		11.8	37.64	21.99	82.29
306	22.1	Female	20.8	1	Lower Limb–Dominant Sports	44.9		11.83	37.6	21.85	82.24
307	22	Male	22.8	1	Lower Limb–Dominant Sports	44.81		11.87	37.5	21.82	82.23
308	20.8	Female	22.3	1	Lower Limb–Dominant Sports	44.76		11.87	37.46	21.75	82.19
309	21.9	Male	24.9	1	Lower Limb–Dominant Sports	44.54		11.92	37.42	21.7	82.15
310	24.5	Male	20.9	0	Lower Limb–Dominant Sports	44.38		11.96	37.39	21.65	82.1
311	25.2	Female	19.3	0	Lower Limb–Dominant Sports	55.89		7.7	43.89	27.04	88.24
312	19.6	Male	21.4	0	Lower Limb–Dominant Sports	55.87		7.8	43.6	26.71	88.18
313	26	Female	19.7	0	Lower Limb–Dominant Sports	55.83		7.86	43.55	26.61	88.15
314	23.6	Male	22.7	1	Lower Limb–Dominant Sports	55.2		7.95	43.48	26.51	88.14
315	21.2	Male	22.9	0	Lower Limb–Dominant Sports	48		10.47	39.42	23.2	84.26
316	18.7	Male	20.7	1	Lower Limb–Dominant Sports	47.99		10.49	39.39	23.2	84.25
317	22.3	Male	18.6	1	Lower Limb–Dominant Sports	47.98		10.5	39.36	23.19	84.22
318	21.8	Female	21.2	1	Upper Limb–Dominant Sports	47.95		10.51	39.35	23.18	84.21
319	18.7	Male	23.1	1	Upper Limb–Dominant Sports	47.92		10.51	39.35	23.17	84.21
320	22.5	Male	22.1	3	Upper Limb–Dominant Sports	47.92		10.52	39.34	23.16	84.19
321	22.7	Male	19.6	1	Upper Limb–Dominant Sports	47.91		10.52	39.34	23.16	84.19
322	22	Female	22.9	1	Upper Limb–Dominant Sports	47.91		10.53	39.32	23.14	84.18
323	26	Male	22	2	Upper Limb–Dominant Sports	47.89		10.57	39.3	23.11	84.18
324	24.7	Male	22.9	2	Upper Limb–Dominant Sports	47.88		10.57	39.3	23.1	84.18
325	24.1	Male	23.5	2	Upper Limb–Dominant Sports	53.73		8.38	43.02	26	87.31
326	26	Female	19.7	1	Upper Limb–Dominant Sports	50.36		7.86	42.33	24.01	86.3
327	23.6	Male	22.7	0	Upper Limb–Dominant Sports	48.73		7.95	40.85	24.12	85.85
328	23.2	Male	22.1	1	Upper Limb–Dominant Sports	46.26		7.96	38.66	22.02	84.17
329	23.6	Male	23.9	1	Upper Limb–Dominant Sports	48.29		8.05	39.89	24.88	85.17
330	21.5	Female	20.7	1	Upper Limb–Dominant Sports	46.27		8.13	41.14	23.02	84.18
331	23.5	Female	23.4	2	Upper Limb–Dominant Sports	46.27		8.18	38.74	22.59	83.61
332	22.5	Male	24.5	0	Upper Limb–Dominant Sports	50.39		9.67	40.84	24.28	85.52
333	19.7	Female	19.8	1	Upper Limb–Dominant Sports	50.39		9.68	40.83	24.24	85.52
334	22	Male	21.3	1	Upper Limb–Dominant Sports	43.75		9.7	37.39	22.07	82.74
335	22	Female	23.2	1	Upper Limb–Dominant Sports	46.08		10	38.28	23.19	83.22
336	23.3	Female	24.9	1	Upper Limb–Dominant Sports	45.17		11	37.46	22.12	83.69
337	21.1	Female	22.4	1	Upper Limb–Dominant Sports	47.83		11	37.64	22.72	83.54
338	24.1	Male	23.5	2	Lower Limb–Dominant Sports	45.38		8.38	37.92	23.47	82.1
339	21.5	Male	23.1	2	Lower Limb–Dominant Sports	52.56		8.96	41.97	25.32	86.37
340	22.4	Male	22.4	1	Lower Limb–Dominant Sports	52.55		8.96	41.94	25.23	86.37
341	20.3	Female	22.5	1	Upper Limb–Dominant Sports	46.75		11	38.91	24.03	84.63
342	19.6	Male	20.8	1	Lower Limb–Dominant Sports	47.34		8.42	38.66	23.53	83.79
343	22.8	Male	23.6	1	Lower Limb–Dominant Sports	44.35		11	36.71	22.09	82.98
344	23.5	Female	24.9	1	Lower Limb–Dominant Sports	46.11		8.45	38.21	22.29	83.62
345	23.6	Female	20.9	1	Lower Limb–Dominant Sports	47.42		8.5	39.93	23.18	84.74
346	22.5	Female	24.3	1	Lower Limb–Dominant Sports	44.9		8.55	38.55	23.23	83.47
347	19.7	Male	23.6	1	Lower Limb–Dominant Sports	47.95		8.61	40.63	24.87	84
348	22.8	Female	21.5	1	Lower Limb–Dominant Sports	46		8.64	37.84	23.37	83.96
349	22.1	Female	20.3	1	Lower Limb–Dominant Sports	46.62		8.68	40.2	22.63	83.6
350	22.6	Female	24.4	1	Lower Limb–Dominant Sports	46		8.69	35.73	22.09	84.67
351	21.7	Male	23.7	1	Lower Limb–Dominant Sports	50.9		8.71	42.13	22.69	85.89
352	22.7	Male	22	1	Lower Limb–Dominant Sports	47.17		8.72	39.69	23.36	85.5
353	18.8	Male	22.5	1	Lower Limb–Dominant Sports	45.08		8.73	38.42	24.23	82.23
354	21.7	Female	21.5	0	Lower Limb–Dominant Sports	48.85		8.73	40.19	23.68	84.75
355	22.9	Female	20.8	1	Upper Limb–Dominant Sports	44.76		8.75	37.01	21.7	82.24
356	21	Female	20.7	1	Upper Limb–Dominant Sports	47.62		8.77	40.13	23.56	83.37
357	22.2	Female	21.9	1	Upper Limb–Dominant Sports	43.28		8.78	36.85	22.44	82.19
358	21.3	Female	24.5	0	Upper Limb–Dominant Sports	44.54		8.8	38.64	21.99	81.66
359	24.7	Male	24.4	1	Upper Limb–Dominant Sports	47.59		8.8	39.91	22.52	85.16
360	21.5	Female	20.7	1	Upper Limb–Dominant Sports	54.71		8.13	43.26	26.37	87.91
361	23.5	Female	23.4	1	Upper Limb–Dominant Sports	54.42		6	43.25	26.35	87.8
362	23.6	Female	21.7	1	Upper Limb–Dominant Sports	54.39		8.24	43.24	26.33	87.76
363	20.9	Male	23.3	1	Upper Limb–Dominant Sports	54.03		8.29	43.19	26.18	87.57
364	22	Male	21.3	1	Upper Limb–Dominant Sports	53.93		8.33	43.09	26.16	87.54
365	22	Female	23.2	1	Upper Limb–Dominant Sports	53.81		7	43.07	26.1	87.51
366	22.4	Male	23.3	0	Upper Limb–Dominant Sports	51.95		9.16	41.69	24.91	86.14
367	21.6	Female	20.2	1	Upper Limb–Dominant Sports	51.95		9.16	41.69	24.9	86.09
368	22.7	Female	23.6	1	Lower Limb–Dominant Sports	47.89		8.94	39.12	24.42	83.86
369	21.5	Male	23.1	1	Lower Limb–Dominant Sports	43.67		8.96	37.04	21.11	82.82
370	22.4	Male	22.4	1	Lower Limb–Dominant Sports	47.85		8.96	37.84	25.44	85.03
371	23.7	Female	21.8	1	Lower Limb–Dominant Sports	46.43		8.97	40.46	20.95	83.43
372	23.1	Female	23.8	1	Lower Limb–Dominant Sports	45.85		8.97	37.75	24.24	84.74
373	25.1	Male	20.7	2	Lower Limb–Dominant Sports	48.42		8.98	39.91	22.73	84.99
374	23.5	Female	21.4	1	Lower Limb–Dominant Sports	49.26		8.99	40.92	22.76	87.15
375	20.3	Female	19.3	1	Lower Limb–Dominant Sports	49.06		9.02	39.06	25.14	84.18
376	23.2	Female	23	1	Lower Limb–Dominant Sports	45.52		9.02	37.99	21.82	82.73
377	20.3	Female	18.6	1	Lower Limb–Dominant Sports	46.58		9.03	37.5	24.22	85.61
378	24.5	Female	22.3	1	Lower Limb–Dominant Sports	47.86		9.06	40.23	21.75	84.61
379	24.4	Male	22.1	1	Lower Limb–Dominant Sports	49.15		9.06	41.24	24.09	85.54
380	19.8	Male	22.2	1	Lower Limb–Dominant Sports	46.24		9.07	38.3	23.16	84.25
381	22.7	Male	18.5	2	Lower Limb–Dominant Sports	46.83		9.1	39.83	22.41	84.79
382	19.7	Male	21.5	2	Lower Limb–Dominant Sports	44.99		9.11	39.39	22.34	81.88
383	22.1	Female	23.7	1	Lower Limb–Dominant Sports	51.72		9.19	41.61	24.84	86.05
384	20.4	Female	24.8	0	Lower Limb–Dominant Sports	51.65		9.21	41.59	24.82	86.05
385	22.4	Male	23.3	2	Lower Limb–Dominant Sports	49.91		9.16	40.14	25.65	86.05
386	21.6	Female	20.2	2	Lower Limb–Dominant Sports	47.06		9.16	38.06	22.41	83.89
387	21.6	Female	19.8	2	Lower Limb–Dominant Sports	49.21		9.16	39.34	26.4	82.74
388	22.9	Female	20.1	1	Lower Limb–Dominant Sports	47.92		9.18	41.28	24.28	84.57
389	22.1	Female	20.3	1	Lower Limb–Dominant Sports	45.91		9.18	37.7	21.85	84.1
390	22.9	Female	23.6	2	Lower Limb–Dominant Sports	47.92		9.19	39.53	22.99	84.05
391	19.7	Female	23.7	0	Lower Limb–Dominant Sports	50.28		9.19	40.51	23.14	86.07
392	22.1	Female	23.7	2	Lower Limb–Dominant Sports	47.13		9.19	39.6	23.56	83.97
393	20.4	Female	24.8	1	Lower Limb–Dominant Sports	50.33		9.21	41.26	24.57	84.95
394	24.9	Female	18.5	1	Lower Limb–Dominant Sports	41.96		9.26	35.21	21.1	81.5
395	22.1	Male	22.7	1	Lower Limb–Dominant Sports	48.84		9.26	39.75	23.23	84.19
396	23.1	Male	21.3	2	Lower Limb–Dominant Sports	47.37		9.28	38.24	22.25	85.23
397	25.1	Female	20.3	3	Lower Limb–Dominant Sports	46.6		11	39.64	22.52	84.21
398	22.9	Male	21.4	3	Lower Limb–Dominant Sports	47.38		9.31	41.64	23.36	84.94
399	23.1	Male	19.1	3	Lower Limb–Dominant Sports	43.22		9.31	36.71	22.76	83.7
400	20.8	Male	20.2	3	Lower Limb–Dominant Sports	46.76		9.31	38.84	23.8	83.37
401	19.6	Female	24.6	3	Lower Limb–Dominant Sports	47.91		9.32	40.34	22.24	84.71
402	26	Male	24.9	1	Lower Limb–Dominant Sports	50.16		9.33	41.56	24.51	85.53
403	18.8	Male	22.8	1	Lower Limb–Dominant Sports	46.16		9.33	38	21.1	84.03
404	22.2	Male	22	1	Lower Limb–Dominant Sports	45.58		9.33	38.93	24.07	85.04
405	19.7	Female	23.1	2	Lower Limb–Dominant Sports	46.2		9.33	38.71	23.3	84.81
406	20	Female	22.7	1	Lower Limb–Dominant Sports	49.03		9.36	38.75	23.81	85.67
407	19.5	Female	20.7	1	Lower Limb–Dominant Sports	47.86		9.36	37.65	24	84.26
408	23.2	Female	21.9	1	Lower Limb–Dominant Sports	46.14		9.41	38.54	23.9	84.21
409	20.8	Male	23.9	2	Lower Limb–Dominant Sports	48.23		9.41	38.81	23.93	84.12
410	25.7	Male	22	1	Lower Limb–Dominant Sports	47.39		9.41	39.47	24.02	84.19
411	22.5	Male	21.4	2	Lower Limb–Dominant Sports	49.14		9.44	41.94	23.89	84.75
412	22	Male	22.4	1	Lower Limb–Dominant Sports	45.8		9.45	39.51	23.97	82.15
413	24	Male	19.4	1	Lower Limb–Dominant Sports	46.54		9.46	38.06	22.93	82.7
414	23.3	Male	24.5	0	Lower Limb–Dominant Sports	46.42		9.47	39	22.51	84.01
415	25.2	Male	21.6	1	Lower Limb–Dominant Sports	44.27		9.48	37.13	21.12	83.66
416	26	Male	19.8	1	Lower Limb–Dominant Sports	47.79		9.48	40.67	23.75	84.13
417	26	Male	21	1	Lower Limb–Dominant Sports	47.72		11.2	38.57	23.23	85.72
418	26	Male	24.4	1	Lower Limb–Dominant Sports	47.21		11	39.77	22.81	84.36
419	24.9	Female	20.5	1	Lower Limb–Dominant Sports	46.73		9.48	38.4	24.41	84.87
420	20.3	Male	24.5	1	Lower Limb–Dominant Sports	49.27		11	41.33	22.86	84.97
421	22.2	Female	23.4	1	Lower Limb–Dominant Sports	51.26		9.51	39.62	24.41	86.33
422	23.7	Male	24.6	1	Lower Limb–Dominant Sports	51.41		9.51	40.58	23.78	84.95
423	21.4	Male	23.4	1	Lower Limb–Dominant Sports	50.5		9.52	40.65	23.58	84.72
424	17.1	Male	23.3	1	Lower Limb–Dominant Sports	51.78		9.53	41.26	24.04	85.65
425	23.4	Male	23.9	1	Lower Limb–Dominant Sports	52.91		9.54	43.26	25.45	86.18
426	23.3	Male	19.5	1	Lower Limb–Dominant Sports	55.87		6	42.95	24.91	88.55
427	22.4	Female	18.9	0	Lower Limb–Dominant Sports	52.45		9.56	42.01	23.31	85.62
428	22.2	Male	21.7	1	Lower Limb–Dominant Sports	52.62		9.57	41.03	27.04	86.18
429	21	Male	23.7	1	Lower Limb–Dominant Sports	51.95		9.57	42.77	24.15	87.13
430	21.4	Male	22	2	Lower Limb–Dominant Sports	48.26		11	40.44	22.03	85.84
431	24.1	Female	22.4	0	Lower Limb–Dominant Sports	52.05		9.58	40.4	25.32	87.29
432	21.7	Female	24.1	1	Lower Limb–Dominant Sports	52.22		9.6	41.47	24.84	86.07
433	22.6	Female	21.6	1	Lower Limb–Dominant Sports	57.03		9.61	41.08	26.37	86.92
434	24.1	Male	24.7	1	Lower Limb–Dominant Sports	51.72		9.61	41.42	23.2	85.9
435	22.4	Male	21.1	1	Lower Limb–Dominant Sports	52.7		9.61	38.9	24.8	83.88
436	23.4	Male	24.9	1	Lower Limb–Dominant Sports	52.03		9.63	43.06	24.56	85.54
437	24.8	Male	23.3	1	Lower Limb–Dominant Sports	49.76		9.64	40.81	25.83	86.87
438	21.4	Male	20	1	Lower Limb–Dominant Sports	54.39		7.8	42.85	24.91	87.57
439	23.2	Female	23.5	1	Lower Limb–Dominant Sports	53.6		9.65	42.84	26.1	85.69
440	25.2	Male	20.8	1	Lower Limb–Dominant Sports	53.68		9.66	43.24	23.69	86.03
441	22.5	Male	24.5	1	Lower Limb–Dominant Sports	50.28		9.67	41.46	22.99	83.27
442	19.7	Female	19.8	1	Lower Limb–Dominant Sports	54.91		7.2	43.48	25.11	85.96
443	24.3	Male	21.9	1	Lower Limb–Dominant Sports	49.3		9.68	39.25	24.48	84.66
444	19.6	Male	24.7	1	Lower Limb–Dominant Sports	53.27		9.72	40.36	25.64	86.71
445	21	Female	20.3	1	Lower Limb–Dominant Sports	56.48		9.73	43.99	26.35	88.18
446	25.3	Female	21.1	1	Lower Limb–Dominant Sports	50.12		9.73	39.32	22.07	83.94
447	23.1	Male	22	0	Lower Limb–Dominant Sports	50.97		9.75	41.69	25.77	86.33
448	20.1	Female	23.8	1	Lower Limb–Dominant Sports	52.3		9.76	41.84	24.13	84.18
449	17.4	Male	22.2	1	Lower Limb–Dominant Sports	51.09		9.8	41.59	25.59	87.26
450	19.5	Male	18.7	1	Lower Limb–Dominant Sports	49		9.81	40.92	22.69	84.92
451	22.6	Female	24.9	1	Lower Limb–Dominant Sports	52.24		9.82	42.23	23.92	86.05
452	23.9	Female	23.2	1	Lower Limb–Dominant Sports	49.98		11	40.27	23.99	84.55
453	17	Female	22.3	1	Lower Limb–Dominant Sports	53.05		9.84	42.8	25.73	86.75
454	23.4	Female	22.1	1	Lower Limb–Dominant Sports	50.26		9.85	41.2	23.34	85.22
455	23.4	Female	20.5	1	Lower Limb–Dominant Sports	55.2		9.86	43.09	23.83	86.23
456	21.2	Male	21.4	1	Lower Limb–Dominant Sports	50.53		9.86	39	26.16	85.87
457	22.4	Male	21.5	1	Lower Limb–Dominant Sports	51.46		9.87	39.98	24.68	86
458	20.1	Female	22.5	1	Lower Limb–Dominant Sports	53.73		9.88	41.57	27.18	86.68
459	19.1	Male	21.7	1	Lower Limb–Dominant Sports	49.64		11	40.84	24.67	83.54
460	26	Male	21.3	1	Lower Limb–Dominant Sports	52.55		9.88	42.06	25.15	87.1
461	24.3	Female	21.6	1	Lower Limb–Dominant Sports	54.71		9.9	41.74	25.32	86.97
462	22.5	Male	20.9	1	Lower Limb–Dominant Sports	48.89		9.92	39.84	23.41	85.52
463	22.3	Male	23	1	Lower Limb–Dominant Sports	52.47		9.94	40.76	23.48	86.14
464	26	Female	24.4	1	Lower Limb–Dominant Sports	52.62		9.96	41.77	23.64	85.53
465	19.6	Female	22.1	1	Lower Limb–Dominant Sports	53.66		9.97	42.65	24.4	86.88
466	23.5	Male	21.6	1	Lower Limb–Dominant Sports	49.63		9.97	39.08	25.43	84.91
467	21.5	Male	21	1	Lower Limb–Dominant Sports	49.46		9.97	38.3	22.26	86.3
468	22.9	Female	21.1	1	Lower Limb–Dominant Sports	53.14		9.98	42.17	23.32	84.91
469	23	Male	24.6	1	Lower Limb–Dominant Sports	52.69		9.98	41.1	25.63	85.99
470	22.3	Male	23.2	0	Lower Limb–Dominant Sports	52.6		9.99	41.74	25.5	86.15
471	20.9	Female	22.8	1	Lower Limb–Dominant Sports	52.79		9.99	41.93	22.74	86.85
472	24.8	Female	23.5	1	Lower Limb–Dominant Sports	50.74		9.99	40.61	24.02	87.29
473	23.5	Female	22.3	1	Lower Limb–Dominant Sports	52.56		9.99	42.8	24.09	86.36
474	23	Male	22.5	1	Lower Limb–Dominant Sports	52.69		9.99	40.52	25.39	87.03
475	22.7	Male	21.5	1	Lower Limb–Dominant Sports	50.67		9.99	41.03	24.21	86.77
476	26	Male	19.5	1	Lower Limb–Dominant Sports	55.83		10	44.37	24.78	86.94
477	23	Male	20.9	1	Lower Limb–Dominant Sports	53.05		10	43.02	25.72	86.46
478	24.2	Male	19.2	1	Lower Limb–Dominant Sports	49.72		10.01	40.72	22.55	84.92
479	21.7	Female	23.4	1	Lower Limb–Dominant Sports	53.41		10.01	43.6	27.29	86.09
480	18.3	Female	21.9	1	Lower Limb–Dominant Sports	50.15		10.01	38.72	22.12	85.17
481	21.2	Female	21.3	1	Lower Limb–Dominant Sports	53.67		10.02	41.11	26.51	86.37
482	19.9	Male	22.2	1	Lower Limb–Dominant Sports	54.42		10.02	42.65	24.55	87.51
483	23.6	Female	20.1	1	Lower Limb–Dominant Sports	50.46		10.02	42.15	23.22	84.08
484	24.6	Female	21.6	1	Lower Limb–Dominant Sports	54.03		10.02	43.55	25.06	87.31
485	23.6	Female	21.1	1	Lower Limb–Dominant Sports	52.93		10.02	41.36	23.92	86.94
486	22.2	Male	22.6	1	Lower Limb–Dominant Sports	53.74		10.04	43.01	25.01	86.03
487	19.7	Female	24.4	0	Lower Limb–Dominant Sports	55.89		6	43.46	25.88	88.9
488	23.7	Female	23.1	1	Lower Limb–Dominant Sports	51.61		10.06	41.61	24.74	85.08
489	24.4	Male	23.6	1	Lower Limb–Dominant Sports	50.59		10.06	42.85	24.7	85.49
490	24.1	Male	22.2	1	Lower Limb–Dominant Sports	50.32		10.06	40.17	23.68	85.52
491	22.3	Male	21.3	1	Lower Limb–Dominant Sports	50.47		8	40.42	22.6	84.7
492	23.3	Female	20.6	1	Lower Limb–Dominant Sports	51.95		10.08	40.42	23.23	85.49
493	26	Male	21.3	1	Lower Limb–Dominant Sports	52.78		10.08	42.83	23.39	88.24
494	19.6	Male	23.5	1	Lower Limb–Dominant Sports	52.65		10.1	40.81	26.46	87.44
495	22	Female	22.7	1	Lower Limb–Dominant Sports	53.75		10.11	41.31	23.62	86.59
496	22.7	Female	24.3	1	Lower Limb–Dominant Sports	52.13		8	41.47	24.76	87.76
497	23.2	Female	23.5	1	Lower Limb–Dominant Sports	55.01		7	42.51	26.61	86.31
498	25.3	Male	21.9	1	Lower Limb–Dominant Sports	51.57		10.15	41.49	25.33	86.49
499	23.1	Male	22.8	1	Lower Limb–Dominant Sports	57.54		6.6	44.01	27.26	87.54
500	21.7	Male	22.4	0	Lower Limb–Dominant Sports	53.35		10.16	41.97	26.18	85.16
501	18.9	Female	21.3	1	Lower Limb–Dominant Sports	50.39		10.16	40.18	24.32	85.37
502	20.5	Female	18.9	1	Lower Limb–Dominant Sports	49.96		10.17	40.05	24.45	84.33
503	25.2	Male	20.4	1	Lower Limb–Dominant Sports	53.06		10.19	42.81	24.8	85.71
504	23.8	Female	24.8	1	Lower Limb–Dominant Sports	51.65		10.2	41.53	24.08	86.62
505	26	Male	24.3	1	Lower Limb–Dominant Sports	53.53		7	43.43	22.17	86.42
506	24.8	Female	22.3	1	Lower Limb–Dominant Sports	53.05		7	41.46	25.98	86.01
507	23.8	Male	22.4	1	Lower Limb–Dominant Sports	51.95		10.23	38.97	24.29	88.14
508	21.1	Female	21.6	1	Lower Limb–Dominant Sports	50.41		10.24	39.59	22.99	84.75
509	23.4	Male	21	1	Lower Limb–Dominant Sports	49.07		10.25	41.26	24.4	83.09
510	22.4	Female	21.9	1	Lower Limb–Dominant Sports	51.21		10.26	41.87	25.55	89.76
511	19.3	Female	20.1	1	Lower Limb–Dominant Sports	53.81		7	44.01	24.82	85.14
512	20.6	Female	24.9	1	Lower Limb–Dominant Sports	52.53		10.3	43.25	24.9	87.17
513	26	Female	22.8	1	Lower Limb–Dominant Sports	49.61		10.3	40.98	24.71	83.21
514	25.4	Male	22.9	1	Lower Limb–Dominant Sports	52.45		10.31	43.07	26.71	85.79
515	25.1	Male	21.8	1	Lower Limb–Dominant Sports	52.87		10.31	42.85	24.2	85.2
516	21.3	Male	20.9	1	Lower Limb–Dominant Sports	50.33		10.32	41.15	24.03	85.29
517	22.7	Female	21.5	1	Lower Limb–Dominant Sports	52.41		7	40.93	24.55	85.65
518	24	Female	22.6	1	Lower Limb–Dominant Sports	52.22		10.34	43.07	26.33	86.32
519	26	Female	23.7	1	Lower Limb–Dominant Sports	49.81		10.34	40.77	24.15	85.79
520	23.2	Female	20.1	1	Lower Limb–Dominant Sports	50.02		10.34	40.64	25.23	84.06
521	21.5	Male	23.9	1	Lower Limb–Dominant Sports	50.42		10.35	40.72	22.93	85.16
522	22.4	Female	21.4	1	Lower Limb–Dominant Sports	51.47		10.36	40.89	24.15	85.65
523	21.1	Female	23.4	1	Lower Limb–Dominant Sports	51.41		10.38	41.65	23.77	85.71
524	22.1	Male	22.1	1	Lower Limb–Dominant Sports	46.54		10.39	38.54	22.13	82.99
525	23.6	Female	22.5	1	Lower Limb–Dominant Sports	47.42		10.39	38.53	22.79	84.22
526	24.4	Male	21.7	1	Lower Limb–Dominant Sports	50.33		10.4	42.45	23.39	85.36
527	21.2	Male	21.4	1	Lower Limb–Dominant Sports	50.33		10.43	40.9	24.09	85.02
528	20.7	Female	24.5	1	Lower Limb–Dominant Sports	50.33		10.43	40.56	23.04	85.09
529	24.5	Male	23.5	1	Lower Limb–Dominant Sports	57.01		10.44	43.89	27.98	88.15
530	19.5	Male	21.4	1	Lower Limb–Dominant Sports	50.44		10.44	40.73	22.9	85.5
531	24.8	Female	23	1	Lower Limb–Dominant Sports	51.57		10.45	42.93	24.48	86.79
532	20.5	Female	20.6	1	Lower Limb–Dominant Sports	51.21		10.46	41.14	24.23	85.46
533	23.1	Female	22.1	1	Lower Limb–Dominant Sports	50.6		10.46	42.02	23.36	86.06
534	23	Male	23.4	1	Lower Limb–Dominant Sports	48.67		10.47	39.85	24.67	84.26
535	20.5	Male	24.9	1	Lower Limb–Dominant Sports	50.82		10.47	40.51	25.73	84.95
536	22.4	Male	20.4	1	Lower Limb–Dominant Sports	47.75		10.47	38.66	23.21	85.78
537	21.2	Male	22.9	0	Lower Limb–Dominant Sports	48.83		10.47	39.85	23.2	85.65
538	18.7	Male	20.7	0	Lower Limb–Dominant Sports	48.33		10.49	38.53	23.56	84.59
539	22.3	Male	18.6	1	Lower Limb–Dominant Sports	49.46		10.5	40.66	22.45	86.38
540	25.1	Male	20.7	1	Lower Limb–Dominant Sports	52.47		8.98	41.9	25.17	86.33
541	23.5	Female	21.4	1	Lower Limb–Dominant Sports	52.45		8.99	41.87	25.16	86.33
542	20.3	Female	19.3	0	Lower Limb–Dominant Sports	52.45		9.02	41.87	25.15	86.32
543	23.2	Female	23	1	Lower Limb–Dominant Sports	52.41		9.02	41.87	25.14	86.32
544	20.3	Female	18.6	2	Lower Limb–Dominant Sports	52.3		9.03	41.84	25.14	86.31
545	24.5	Female	22.3	1	Lower Limb–Dominant Sports	52.24		9.06	41.77	25.11	86.3
546	24.4	Male	22.1	0	Lower Limb–Dominant Sports	52.22		9.06	41.76	25.06	86.3
547	19.8	Male	22.2	0	Upper Limb–Dominant Sports	52.22		9.07	41.74	25.03	86.23
548	22.7	Male	18.5	0	Upper Limb–Dominant Sports	52.18		9.1	41.74	25.01	86.19
549	19.7	Male	21.5	0	Upper Limb–Dominant Sports	52.13		9.11	41.73	25.01	86.18
550	17.5	Female	24.1	0	Upper Limb–Dominant Sports	52.05		9.13	41.71	24.94	86.18
551	26	Male	24.9	1	Upper Limb–Dominant Sports	51.41		9.33	41.46	24.71	85.96
552	18.8	Male	22.8	1	Upper Limb–Dominant Sports	51.41		9.33	41.46	24.7	85.96
553	22.2	Male	22	0	Upper Limb–Dominant Sports	51.36		9.33	41.42	24.68	85.93
554	19.7	Female	23.1	1	Upper Limb–Dominant Sports	51.26		9.33	41.36	24.67	85.91
555	20	Female	22.7	1	Upper Limb–Dominant Sports	51.21		9.36	41.33	24.67	85.9
556	19.5	Female	20.7	1	Upper Limb–Dominant Sports	51.21		9.36	41.31	24.67	85.89
557	23.2	Female	21.9	2	Upper Limb–Dominant Sports	51.14		9.41	41.28	24.61	85.88
558	20.8	Male	23.9	1	Upper Limb–Dominant Sports	51.1		9.41	41.28	24.6	85.87
559	25.7	Male	22	1	Upper Limb–Dominant Sports	51.09		9.41	41.26	24.57	85.87
560	22.5	Male	21.4	1	Upper Limb–Dominant Sports	51.03		9.44	41.26	24.57	85.85
561	22	Male	22.4	1	Upper Limb–Dominant Sports	51		9.45	41.26	24.56	85.84
562	24	Male	19.4	1	Upper Limb–Dominant Sports	51		9.46	41.26	24.56	85.81
